# Supplementary material for: Characterisation of a Novel Acetyl Xylan Esterase (BaAXE) Screened from the Gut Microbiota of the Common Black Slug (Arion ater)
Source: MDPI journal article supplement (doi:10.3390/molecules27092999), 2022-05-07
Supplement: s1 [file s1]

Supplementary Data.

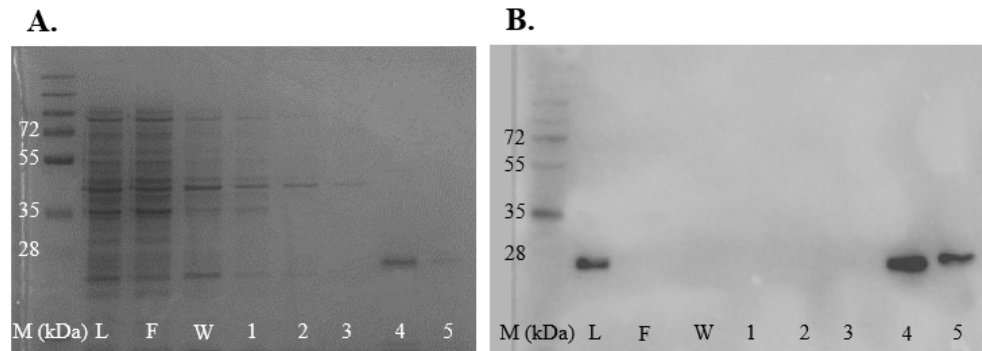

**Figure S1. Purification of Gene\_id\_40363.** Proteins from lysed cells were passed through HisTalon gravity columns and eluted with stepwise concentrations of imidazole. Aliquots of the lysate (L), flow-through (F), wash (W) and elutions (lanes 1-5) were analysed on SDS-PAGE (A) and western blot (B). Elution fractions 1-5 represents 20%, 40%, 60%,80 % and 90% of a 150 mM imidazole elution buffer (50 mM sodium phosphate, 150 mM NaCl) respectively.

|                            |                                                                         |  |  |  |
|----------------------------|-------------------------------------------------------------------------|--|--|--|
| Method file                | D:\MassHunter\GCMS\1\methods\Henry 50-290, 15min, 150C inlet 10 spilt.M |  |  |  |
| Tune file                  | ATUNE.U                                                                 |  |  |  |
| Ion source                 | EI                                                                      |  |  |  |
| Source temperature (°C)    | 230                                                                     |  |  |  |
| Quad temperature (°C)      | 150                                                                     |  |  |  |
| Fixed Electron energy (eV) | 70.0                                                                    |  |  |  |
| Acquisition Type           | Scan                                                                    |  |  |  |
| Stop time (min)            | 10.00                                                                   |  |  |  |
| Solvent delay (min)        | 2.00                                                                    |  |  |  |
| Trace Ion Detection        | False                                                                   |  |  |  |
| Gain Factor                | 1                                                                       |  |  |  |
| EM Saver                   | False                                                                   |  |  |  |
| EM Saver Limit             | N/A                                                                     |  |  |  |

|                    |            |          |           |             |
|--------------------|------------|----------|-----------|-------------|
| Scan Time Segments |            |          |           |             |
| Time               | Start Mass | End Mass | Threshold | Scan Speed  |
| 2.00               | 40         | 200      | 150       | 1,562 [N=2] |

**Figure S2. MS Parameter Report.**
